# Supplementary material
Source: publisher figshare collection journal article supplement (https://acs.figshare.com/ndownloader/files/33962147)
Supplement: Supplementary file 1 [file 33962147]

## Supporting Information

### **Hierarchically Hybrid Porous Co<sub>3</sub>O<sub>4</sub>@NiMoO<sub>4</sub>/CoMoO<sub>4</sub> Heterostructure for High-Performance Electrochemical Energy Storage**

Yan Wang<sup>\*a</sup>, Siming Yu<sup>a</sup> Ce-yu Deng<sup>a</sup>, Hua-liang Wei<sup>a</sup>, Jian-hao Zhou<sup>a</sup>, Ze-xiang Chen<sup>\*a</sup>,  
Huan Yang<sup>a</sup>, Ming-Jin Liu<sup>b,c,d</sup>, Bing-Ni Gu<sup>b,c,d</sup>, Chia-Chen Chung<sup>b,c,d</sup>, Hui-fang Lv<sup>a</sup>, Zhi-yu  
Zhou<sup>a</sup> and Yu-Lun Chueh<sup>\*b,c,d</sup>

<sup>a</sup>School of Optoelectronic Science and Engineering of UESTC, University of Electronic  
Science and Technology of China, Jianshe North Road 4, 610054 Chengdu, China..

<sup>b</sup>Department of Materials Science and Engineering, National Tsing Hua University,  
Hsinchu, 30013, Taiwan.

<sup>c</sup>Frontier Research Center on Fundamental and Applied Sciences of Matters, National  
Tsing Hua University, 3 Hsinchu, Taiwan.

<sup>d</sup>Department of Physics, National Sun Yat-Sen University, Kaohsiung, 80424, Taiwan.

**\*E-mail Address:** wangyan127@uestc.edu.cn; zxchen@uestc.edu.cn and  
ylchueh@mx.nthu.edu.tw

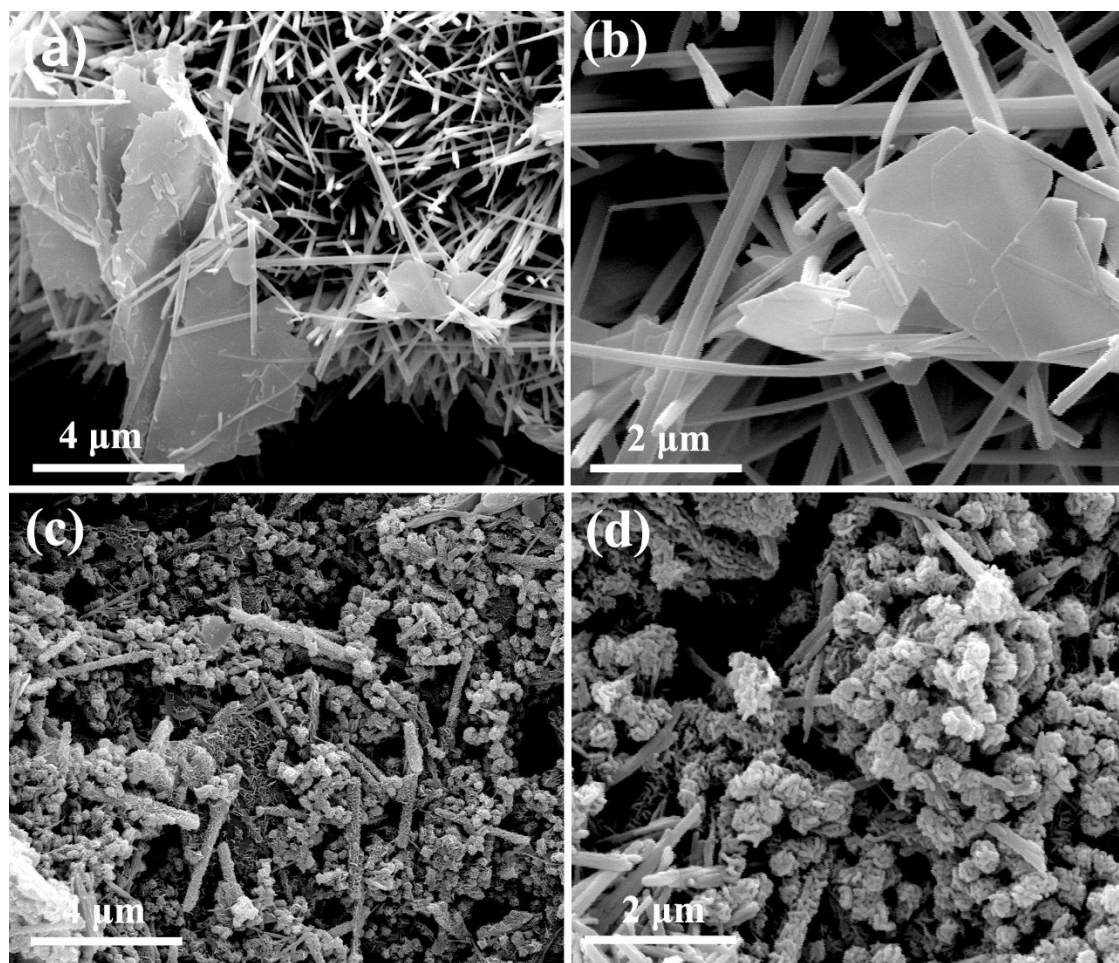

**Figure S1** (a) Low- and (b) high-magnification of SEM images of samples obtained with 0 mmol  $\text{Na}_2\text{MoO}_4$ . (c) Low- and (d) high-magnification of SEM images of samples obtained with 4 mmol  $\text{Na}_2\text{MoO}_4$

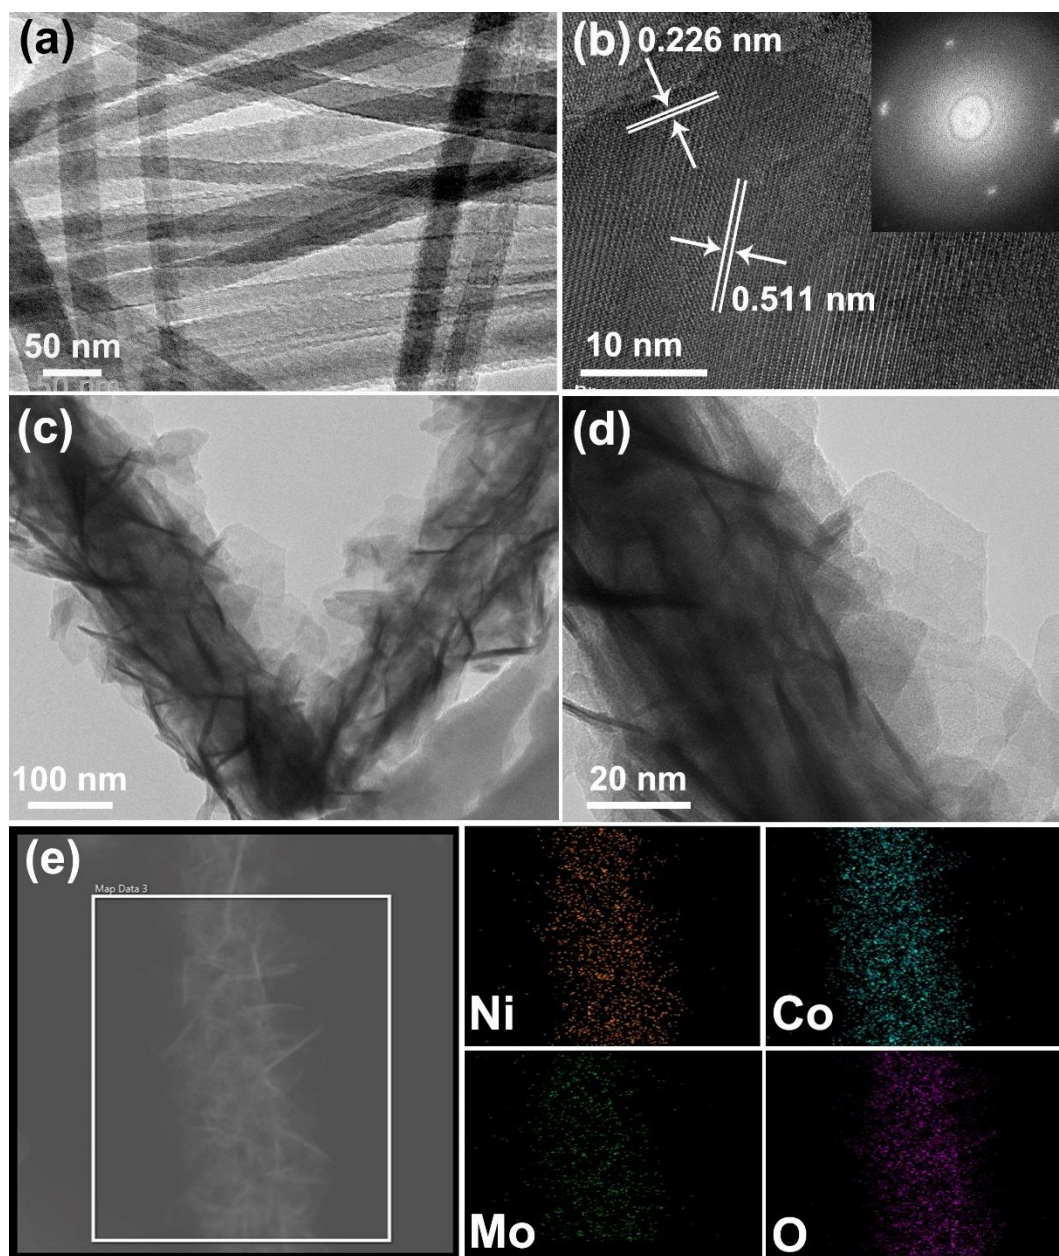

**Figure S2** (a) TEM images of the Co-precursor, (b) HRTEM images of the Co-precursor, (c) Low- and (d) high-magnification of TEM images of Co-precursor@NiMoO<sub>4</sub>/CoMoO<sub>4</sub>. (e) EDS elemental mapping images of the Co-precursor@NiMoO<sub>4</sub>/CoMoO<sub>4</sub>.

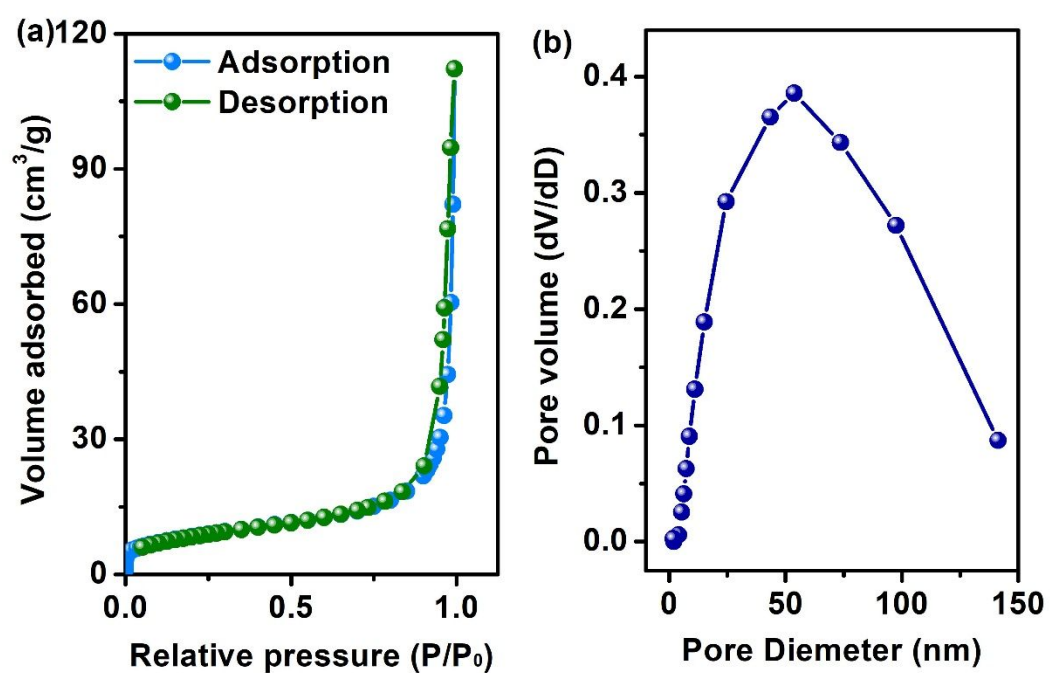

**Figure S3** The Brunauer–Emmett–Teller (BET) surface areas and the pore size distribution of Co-precursor@NiMoO<sub>4</sub>/CoMoO<sub>4</sub>.

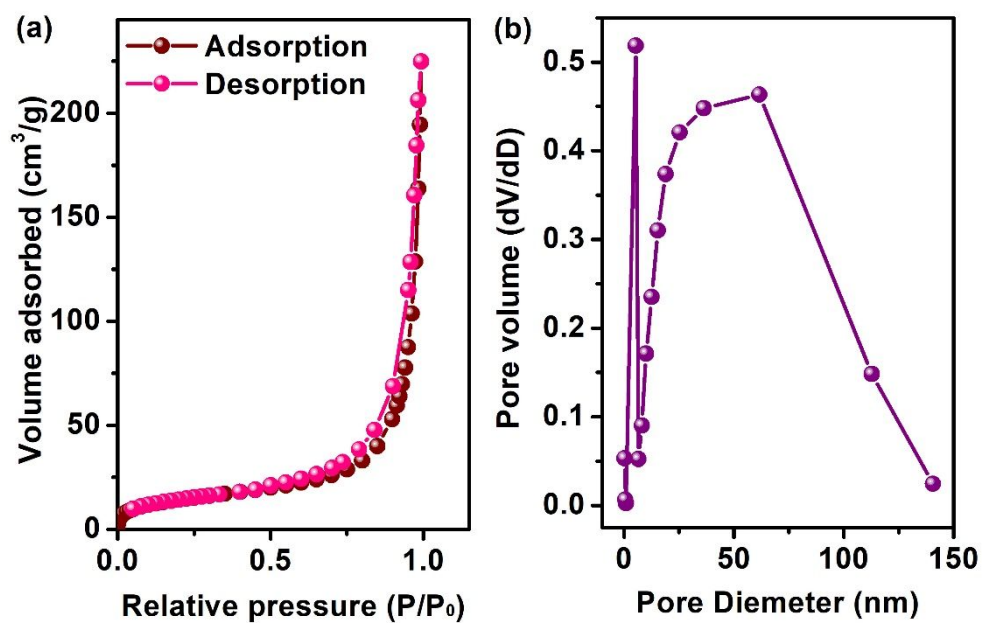

**Figure S4** The Brunauer–Emmett–Teller (BET) surface areas and the pore size distribution of porous  $\text{Co}_3\text{O}_4@\text{NiMoO}_4/\text{CoMoO}_4$  composite.

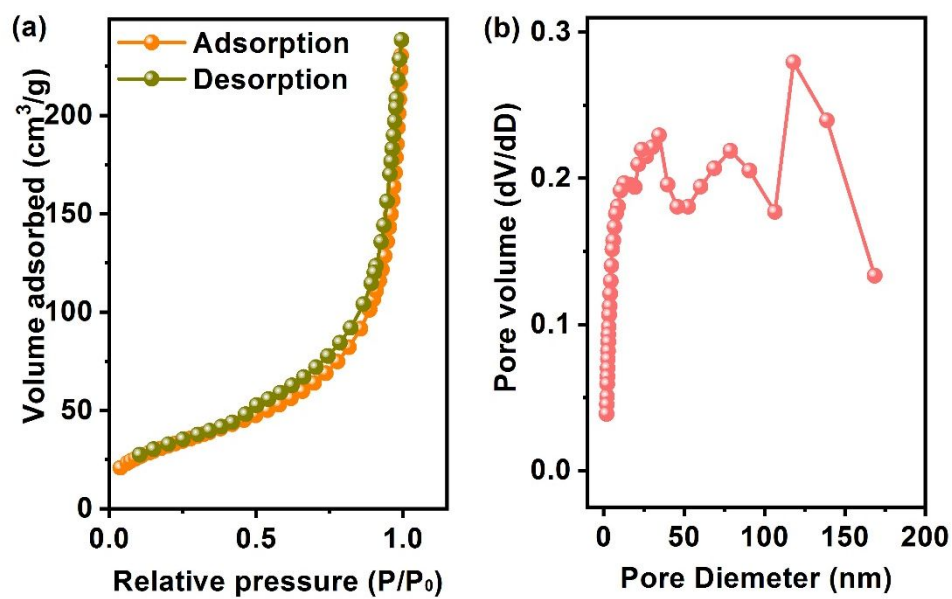

**Figure S5** The Brunauer–Emmett–Teller (BET) surface areas and the pore size distribution of porous  $\text{Co}_3\text{O}_4@\text{NiMoO}_4/\text{CoMoO}_4\text{-N}$  composite.

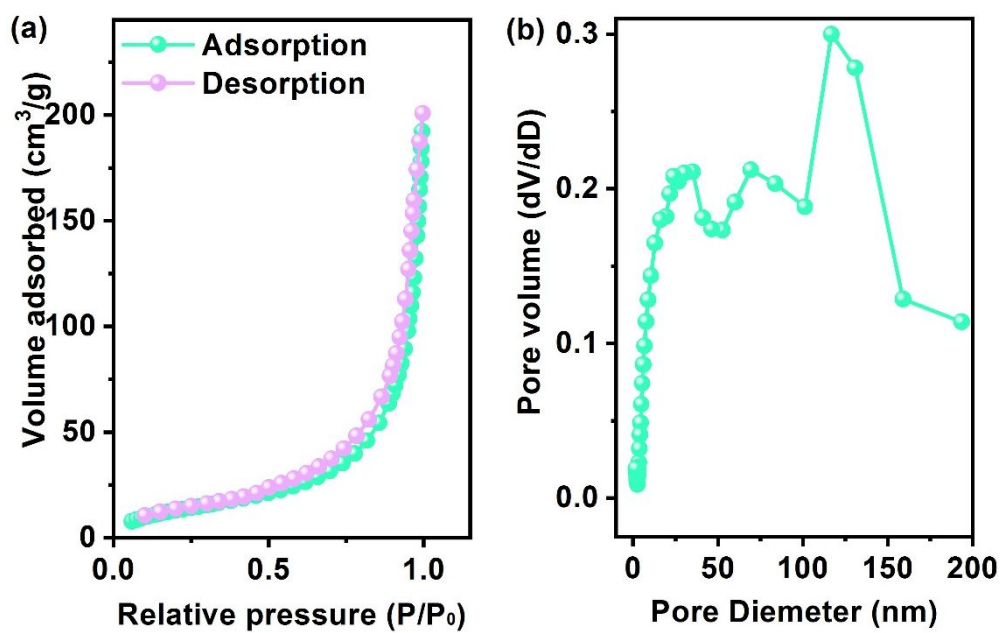

**Figure S6** The Brunauer–Emmett–Teller (BET) surface areas and the pore size distribution of porous  $\text{Co}_3\text{O}_4@\text{NiMoO}_4/\text{CoMoO}_4\text{-E}$  composite.

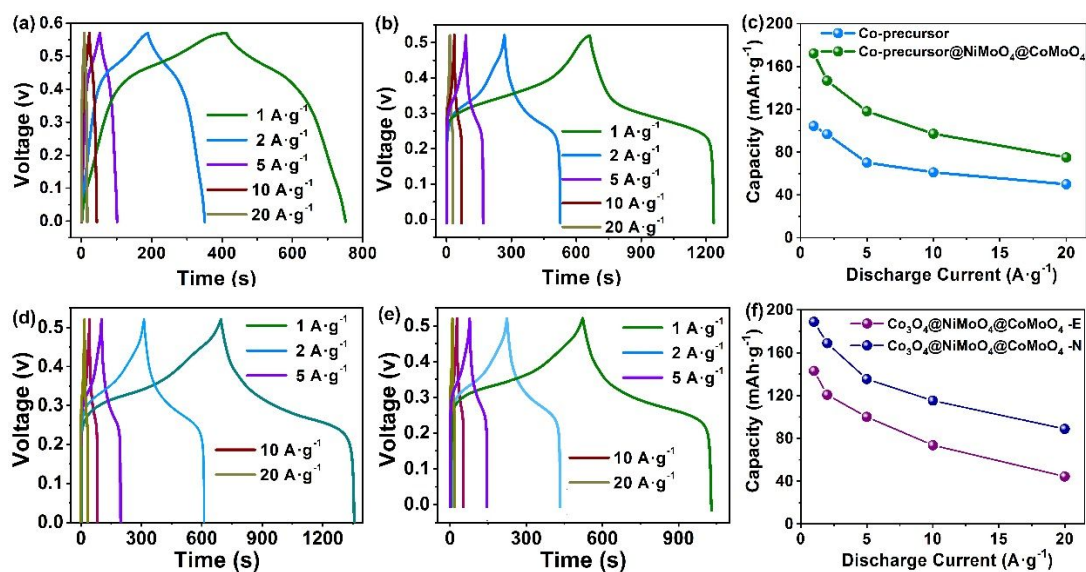

**Figure S7** (a) and (b) are the Charge–discharge curves of the Co–precursor and Co–precursor@NiMoO<sub>4</sub>/CoMoO<sub>4</sub>, (c) the corresponding specific capacities of Co–precursor and Co–precursor@NiMoO<sub>4</sub>/CoMoO<sub>4</sub>. (d) and (e) are the Charge–discharge curves of the Co<sub>3</sub>O<sub>4</sub>@NiMoO<sub>4</sub>/CoMoO<sub>4</sub>-N and Co<sub>3</sub>O<sub>4</sub>@NiMoO<sub>4</sub>/CoMoO<sub>4</sub>-E. (f) the corresponding specific capacities of Co<sub>3</sub>O<sub>4</sub>@NiMoO<sub>4</sub>/CoMoO<sub>4</sub>-N and Co<sub>3</sub>O<sub>4</sub>@NiMoO<sub>4</sub>/CoMoO<sub>4</sub>-E

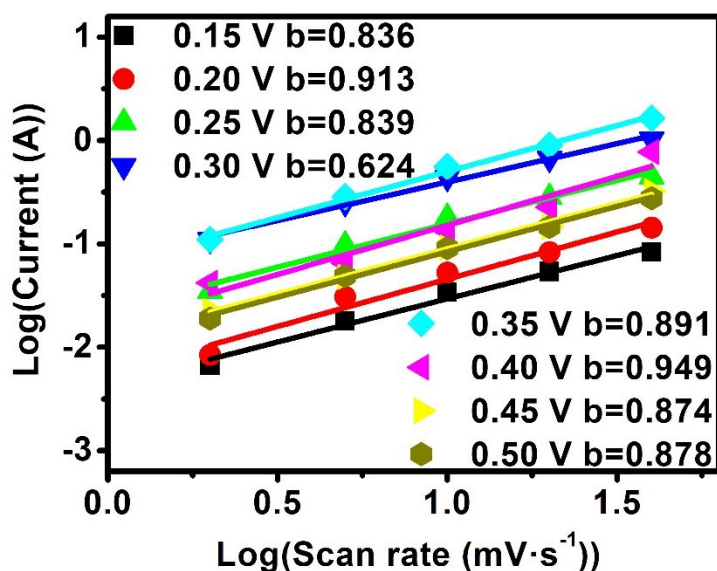

**Figure S8** Calculated b–values for the porous Co<sub>3</sub>O<sub>4</sub>@NiMoO<sub>4</sub>/CoMoO<sub>4</sub> composite at various potentials from the CV test.

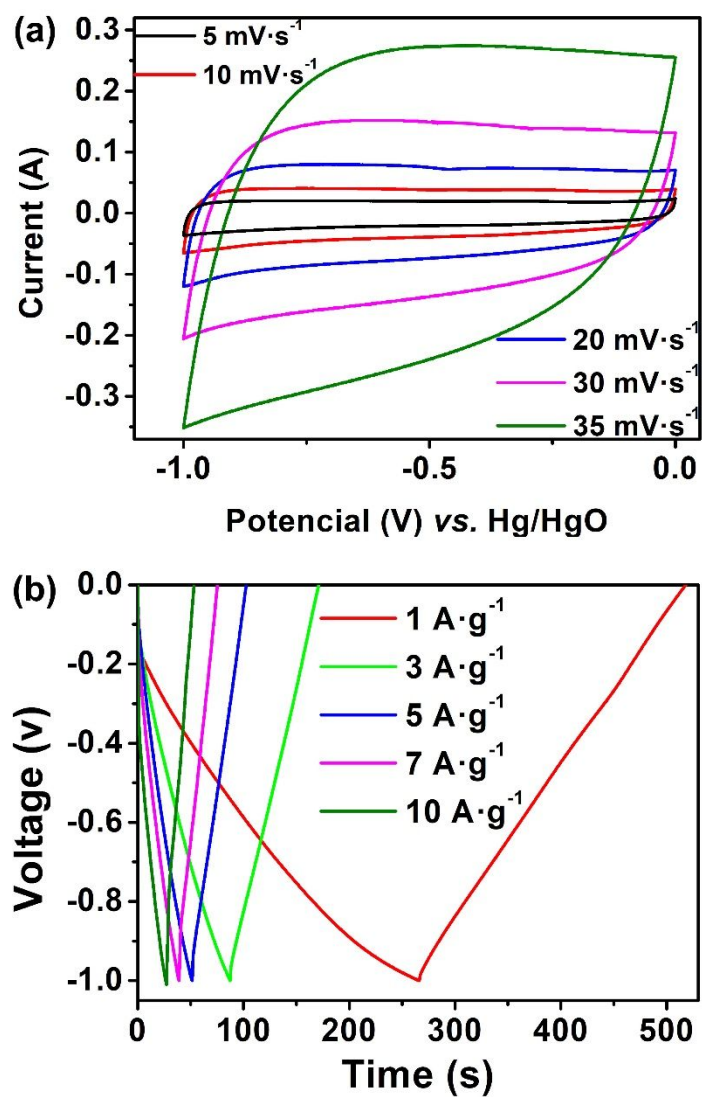

**Figure S9** (a) The Charge–discharge curves of the AC, (b) the corresponding specific capacitance of AC.
